# Supplementary material for: High Performance PA 6/Cellulose Nanocomposites in the Interest of Industrial Scale Melt Processing
Source: MDPI journal article supplement (doi:10.3390/polym13091495), 2021-05-06
Supplement: s1 [file s1]

Article

# High Performance PA 6/Cellulose Nanocomposites in the Interest of Industrial Scale Melt Processing

Pruthvi K Sridhara and Fabiola Vilaseca \*

Advanced Biomaterials and Nanotechnology, Department of Chemical Engineering, University of Girona, 17003 Girona, Spain; pruthvi.sridhara@udg.edu

\* Correspondence: fabiola.vilaseca@udg.edu; Tel.: +34-667-292-597

**Citation:** Sridhara, P.K.; Vilaseca, F. High Performance PA 6/Cellulose Nanocomposites in the Interest of Industrial Scale Melt Processing. *Polymers* **2021**, *13*, 1495. <https://doi.org/10.3390/polym13091495>

Academic Editor: Giulia Fredi

Received: 20 April 2021

Accepted: 3 May 2021

Published: 6 May 2021

**Publisher's Note:** MDPI stays neutral with regard to jurisdictional claims in published maps and institutional affiliations.

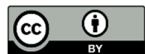

**Copyright:** © 2021 by the authors. Licensee MDPI, Basel, Switzerland. This article is an open access article distributed under the terms and conditions of the Creative Commons Attribution (CC BY) license (<http://creativecommons.org/licenses/by/4.0/>).

## Supplementary Materials

**Table S1.** Melt flow indices (MFI) and melt volume flow rate (MVR) for neat PA 6 and PA 6/CNF nanocomposites at different masses.

| CNF Content (wt.%) |                         | Mass        |              |             |           |              |            |               |
|--------------------|-------------------------|-------------|--------------|-------------|-----------|--------------|------------|---------------|
|                    |                         | M1 (1.2 kg) | M2 (2.16 kg) | M3 (3.8 kg) | M4 (5 kg) | M5 (7.16 kg) | M6 (10 kg) | M7 (12.16 kg) |
| PA 6               | MFI (g/10min)           | 4.74        | 9.07         | 16.95       | 22        | 34.63        | 55.33      | -             |
|                    | MVR (m <sup>3</sup> /s) | 0.0069      | 0.013        | 0.025       | 0.032     | 0.051        | 0.08       | -             |
| 5                  | MFI (g/10min)           | 4.66        | 8.76         | 14.85       | 19.38     | 28.46        | 39.76      | -             |
|                    | MVR (m <sup>3</sup> /s) | 0.0066      | 0.013        | 0.022       | 0.028     | 0.041        | 0.058      | -             |
| 15                 | MFI (g/10min)           | -           | -            | 13.48       | 17.08     | 22.63        | 33.53      | 41.98         |
|                    | MVR (m <sup>3</sup> /s) | -           | -            | 0.019       | 0.024     | 0.032        | 0.047      | 0.059         |
| 25                 | MFI (g/10min)           | -           | -            | 10.64       | 13.68     | 21.12        | 28.76      | 34.34         |
|                    | MVR (m <sup>3</sup> /s) | -           | -            | 0.015       | 0.019     | 0.029        | 0.04       | 0.047         |
